# Supplementary material
Source: PubMed Central journal article supplement (PMC8579317)
Supplement: mmc1.pdf [file mmc1.pdf]

## Normative Cardiopulmonary Exercise Test Responses at the Ventilatory Threshold in Canadian Adults 40 to 80 Years of Age

*Hayley Lewthwaite, PhD; Omar Elsewify, BSc (Hons); Frank Niro, MSc; Jean Bourbeau, MD; Jordan A. Guenette, PhD; François Maltais, MD; Darcy D. Marciniuk, MD; Denis E. O'Donnell, MD; Benjamin M. Smith, MD; Michael K. Stickland, PhD; Wan C. Tan, MD; and Dennis Jensen, PhD; on behalf of the CanCOLD Collaborative Research Group\*, and the Canadian Respiratory Research Network*

CHEST 2021; 159(5):1922-1933

*Online supplements are not copyedited prior to posting and the author(s) take full responsibility for the accuracy of all data.*

© 2021 AMERICAN COLLEGE OF CHEST PHYSICIANS. Reproduction of this article is prohibited without written permission from the American College of Chest Physicians. See online for more details. DOI: 10.1016/j.chest.2020.11.009

## **e-Appendix 1**

### **Detailed eligibility criteria**

Specific exclusion criteria for the current study were: 1) cigarette smoking history of >5 pack years; 2) self-reported chronic bronchitis, chronic obstructive pulmonary disease, diabetes, angina or myocardial infarction (participants who self-reported systemic hypertension with no other cardiovascular disease were not excluded); 3) abnormal pulmonary function at rest, defined as a forced expiratory volume in 1-sec ( $FEV_1$ ), forced vital capacity (FVC) or diffusing capacity of the lungs for carbon monoxide less than the lower limit of normal or a total lung capacity less than 80% predicted, using recommended reference values (references<sup>15-17</sup> in main manuscript) and/or evidence of reversible airflow obstruction (i.e., increase in  $FEV_1$  or FVC >12% and >200 mL 10-15 min after administration of 200-400 mcg albuterol or equivalent) ; 4) not achieving a symptom or physiological limitation to CPET, which was defined as meeting one or more of the criteria of: a respiratory exchange ratio  $\geq 1$ , an intensity rating of breathing/leg discomfort of  $\geq 5$  on the 0-10 modified Borg scale or a peak heart rate no less than 10  $\text{beats}\cdot\text{min}^{-1}$  of the age-predicted maximum of  $220-\text{age}$ ; or 5) an abnormal CPET response determined by the supervising physician.

### **Inspiratory capacity derived parameters**

Inspiratory capacity (IC) derived parameters included:

- Inspiratory reserve volume (IRV) = IC assessed at peak exercise minus the concomitant 30-sec averaged tidal volume [ $V_T$ ];
- End-expiratory lung volume (EELV) = total lung capacity (TLC) assessed with body plethysmography at rest minus IC;
- End-inspiratory lung volume (EILV) = TLC assessed with body plethysmography at rest minus IRV.

IC maneuvers were visually inspected and adjusted to the level of a stable EELV, if required. This approach assumed TLC did not change during exercise in healthy adults (Stubbing et al. *J Appl Physiol Respir Environ Exerc Physiol*. 1980;49(3):506-10. doi: 10.1152/jappl.1980.49.3.506).

### **Ventilatory threshold (Tvent) identification**

The Tvent was identified using two established and commonly used non-invasive methods during incremental CPET, the V-Slope (see references<sup>22-26</sup> of main manuscript) and Dual Criterion (see reference<sup>27</sup> of main manuscript). The V-slope method identifies Tvent as the point at which the rate of CO<sub>2</sub> production ( $V'\text{CO}_2$ ) accelerates beyond the rate of oxygen consumption ( $V'\text{O}_2$ ), without hyperventilation. Identifying Tvent using the V-slope method requires plotting  $V'\text{CO}_2$  against  $V'\text{O}_2$  and evaluating the point of inflection. The Dual Criterion method involves simultaneous evaluation of the ventilatory equivalent for O<sub>2</sub> ( $V'_E/V'\text{O}_2$ ) and ventilatory equivalent for CO<sub>2</sub> ( $V'_E/V'\text{CO}_2$ ); Tvent is identified as the point at which there is a systematic increase in  $V'_E/V'\text{O}_2$  without a simultaneous increase in  $V'_E/V'\text{CO}_2$ . For accurate identification of Tvent, clinical CPET guidelines recommend using both V-slope and Dual Criterion methods. Two independent raters (OE, FN) first identified  $V'\text{O}_2$  at Tvent using the V-slope method with data averaged in 10-sec epochs. This value was cross-referenced with the Dual Criterion method, making manual adjustments if necessary.

**e-Table 1** Health characteristics and peak rate of oxygen consumption ( $V'O_{2peak}$ ) responses for participants included in the current study ( $n=96$ ) compared to those excluded ( $n=46$ ) due to cardiopulmonary exercise testing data inaccessible for analyses

| Participant characteristic                          | Participants of current study<br>$n=96$ | Participants from excluded sites<br>$n=46$ | $p=^*$ |
|-----------------------------------------------------|-----------------------------------------|--------------------------------------------|--------|
| Age (years)                                         | 63 (9)                                  | 62 (9)                                     | 0.620  |
| Sex (male $n=$ , %)                                 | 47 (49%)                                | 16 (35%)                                   | 0.158  |
| Height (cm)                                         | 168.0 (9.0)                             | 164.0 (9.8)                                | 0.017  |
| Body mass (kg)                                      | 76.2 (14.0)                             | 70.2 (13.7)                                | 0.017  |
| BMI ( $kg \cdot m^{-2}$ )                           | 27.0 (4.2)                              | 26.2 (4.6)                                 | 0.320  |
| FEV <sub>1</sub> (L)                                | 2.95 (0.71)                             | 2.80 (0.72)                                | 0.228  |
| FEV <sub>1</sub> (%predicted)                       | 104 (14)                                | 105 (13)                                   | 0.642  |
| FVC (L)                                             | 3.80 (0.91)                             | 3.53 (0.89)                                | 0.095  |
| FVC (%predicted)                                    | 104 (14)                                | 104 (13)                                   | 0.966  |
| TLC (%predicted)                                    | 102 (12)                                | 109 (13)                                   | 0.003  |
| D <sub>L</sub> CO (%predicted)                      | 112 (19)                                | 130 (19)                                   | <0.001 |
| Cigarette Pack Years                                | 0.64 (1.40)                             | 0.18 (0.89)                                | 0.021  |
| Cigarette smoking status, $n=$ (%)                  |                                         |                                            | 0.004  |
| Never                                               | 71 (74%)                                | 44 (96%)                                   |        |
| Former                                              | 25 (26%)                                | 2 (4%)                                     |        |
| MVPA ( $hours \cdot week^{-1}$ )                    | 2.7 (2.5)                               | 2.3 (1.8)                                  | 0.267  |
| $V'O_{2peak}$ ( $mL \cdot kg^{-1} \cdot min^{-1}$ ) | 26.7 (7.3)                              | 21.7 (8.2)                                 | 0.001  |
| $V'O_{2peak}$ (%predicted) <sup>#</sup>             | 108 (23)                                | 88 (22)                                    | <0.001 |

\*unpaired t-test for continuous variables; chi-squared test for categorical variables

<sup>##</sup>Predicted using reference equations by Lewthwaite et al. <sup>11</sup>

Results presented as mean (SD) unless otherwise indicated

BMI, body mass index; D<sub>L</sub>CO, carbon monoxide diffusing capacity of the lungs; FEV<sub>1</sub>, forced expiratory volume in 1-sec; FVC, forced vital capacity; MVPA, moderate-to-vigorous intensity physical activity assessed by self-report with the Community Healthy Activities Models Program for Seniors questionnaire [20]; TLC, total lung capacity

**e-Table 2** Rate of O<sub>2</sub> consumption ( $V'O_2$ ) during symptom-limited incremental cardiopulmonary cycle exercise testing at the ventilatory threshold (T<sub>vent</sub>) identified by two blinded and independent raters using a combination of V-slope and Dual Criterion detection methods.

|                                                            | Rater 1                          | Rater 2                          | Absolute ( $L \cdot min^{-1}$ )<br>mean difference<br>(Rater 1-Rater 2) | Relative (%)<br>mean difference<br>(Rater 1-Rater 2) |
|------------------------------------------------------------|----------------------------------|----------------------------------|-------------------------------------------------------------------------|------------------------------------------------------|
| $V'O_2$ ( $L \cdot min^{-1}$ ), mean $\pm$ SD<br>[min-max] | 0.94 $\pm$ 0.31<br>[0.36 - 1.95] | 0.96 $\pm$ 0.31<br>[0.38 - 1.81] | 0.06 $\pm$ 0.05<br>[-0.18 - 0.14]                                       | 6 $\pm$ 6<br>[-23 - 25]                              |

**e-Figure 1 (a-j):** Bivariate relationships between explanatory variables and physiological responses during symptom-limited incremental cardiopulmonary cycle exercise testing at the ventilatory threshold (Tvent) in Canadian adults aged 40-80 years.

- a)** Bivariate relationships between explanatory variables and O<sub>2</sub> pulse during symptom-limited incremental cardiopulmonary cycle exercise testing at the ventilatory threshold (Tvent) in Canadian females (closed blue circles; n=49) and males (closed red circles; n=47) aged 40-80 years.

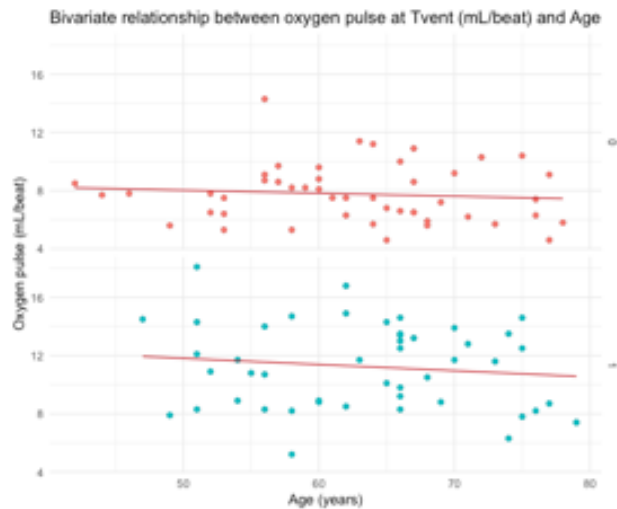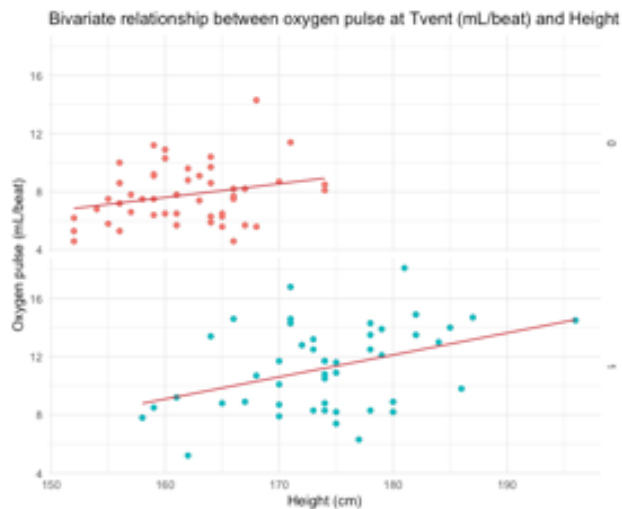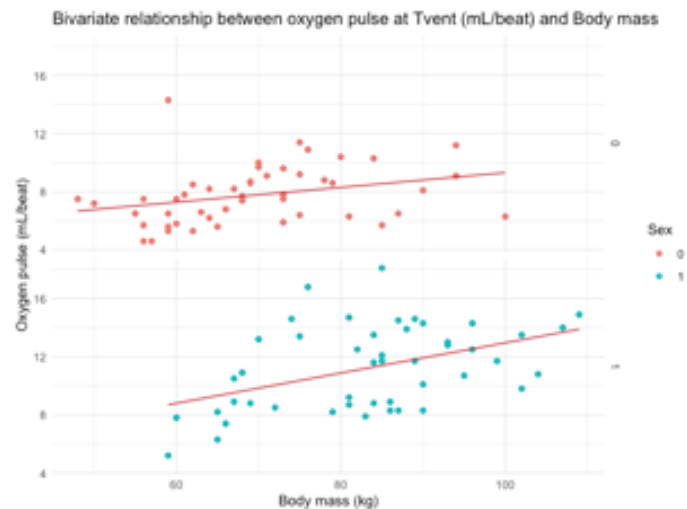

# CHEST™ Online Supplement

- b)** Bivariate relationships between explanatory variables and the rate of oxygen consumption ( $\dot{V}O_2$ ) during symptom-limited incremental cardiopulmonary cycle exercise testing at the ventilatory threshold (Tvent) in Canadian females (closed blue circles; n=49) and males (closed red circles; n=47) aged 40-80 years.

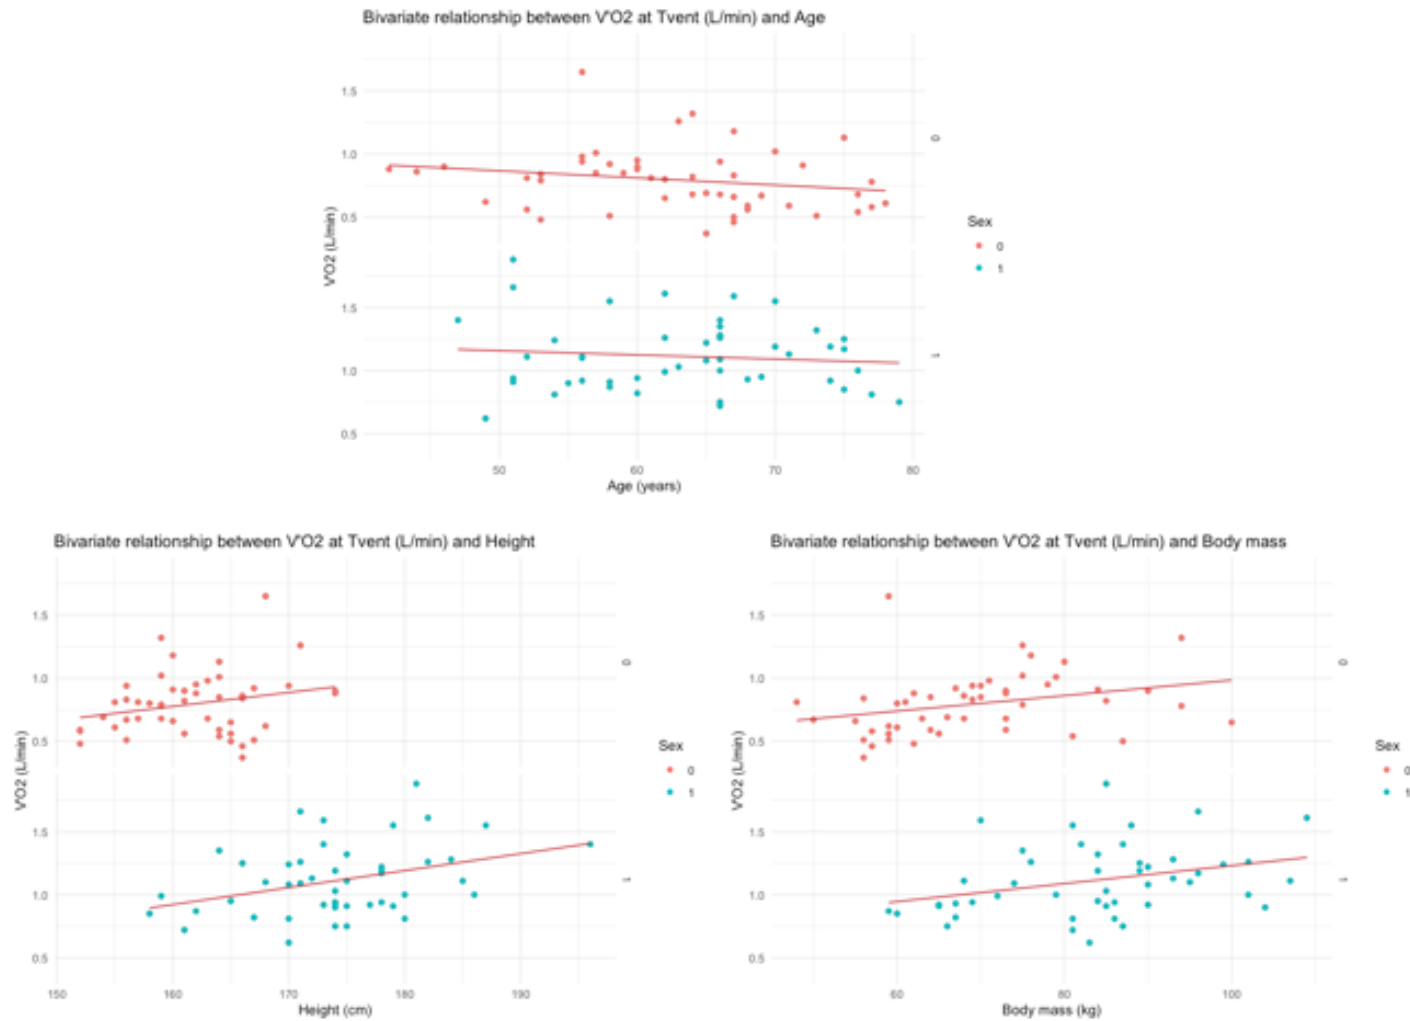

- c) Bivariate relationships between explanatory variables and the rate of CO<sub>2</sub> production ( $\dot{V}CO_2$ ) during symptom-limited incremental cardiopulmonary cycle exercise testing at the ventilatory threshold (Tvent) in Canadian females (closed blue circles; n=49) and males (closed red circles; n=47) aged 40-80 years.

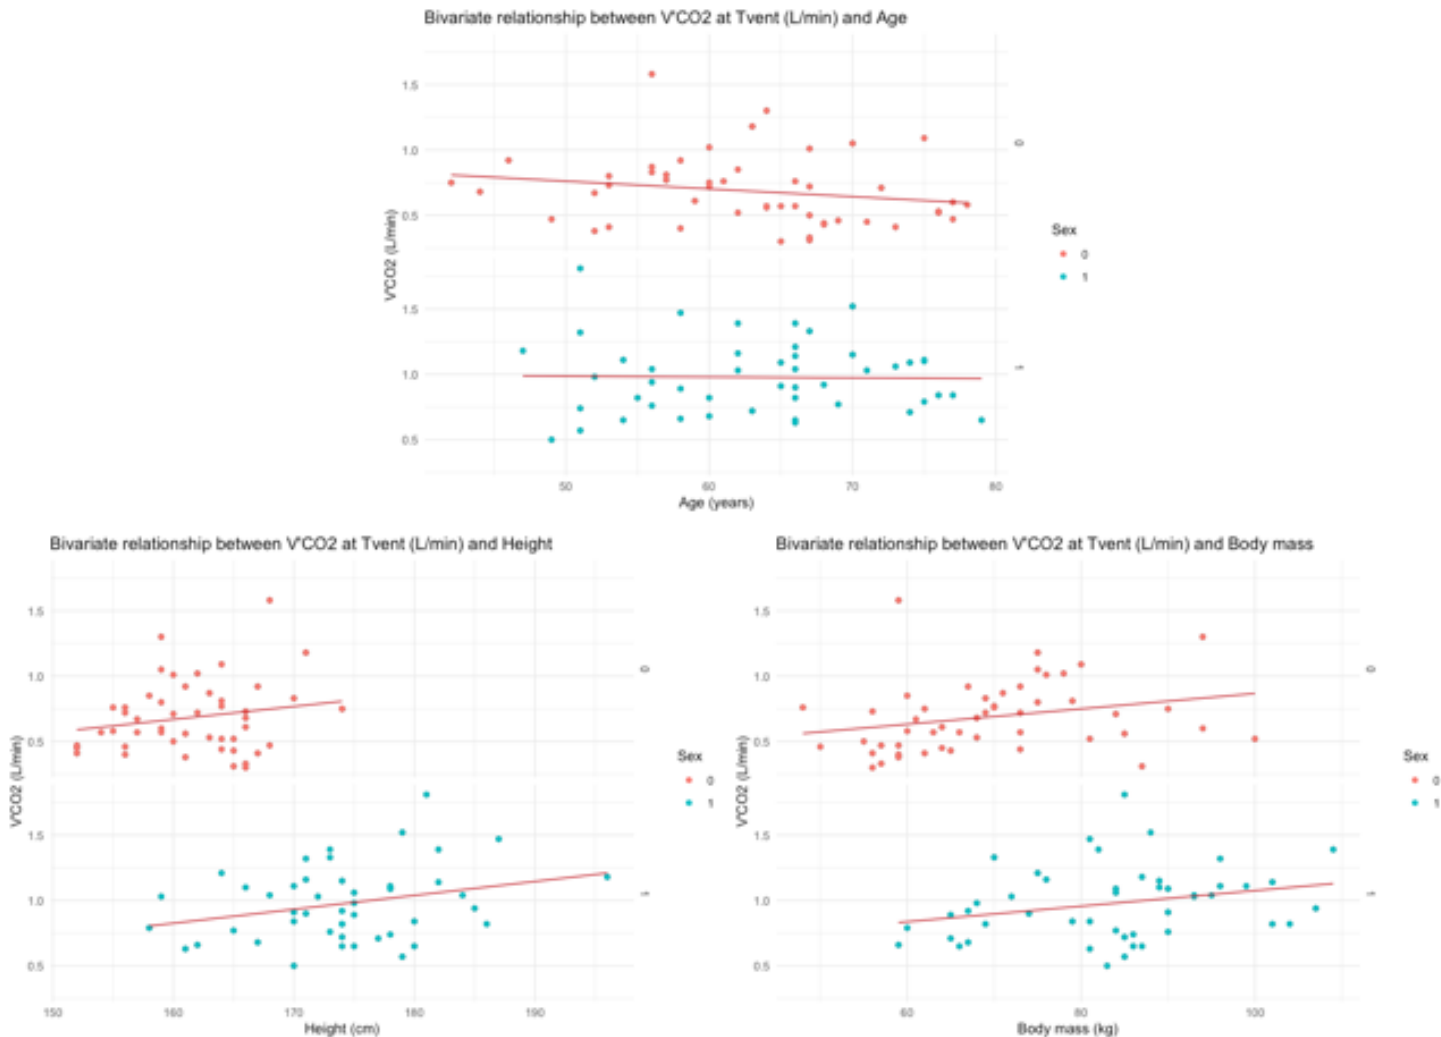

# CHEST™ Online Supplement

- d) Bivariate relationships between explanatory variables and minute ventilation during symptom-limited incremental cardiopulmonary cycle exercise testing at the ventilatory threshold (Tvent) in Canadian females (closed blue circles; n=49) and males (closed red circles; n=47) aged 40-80 years.

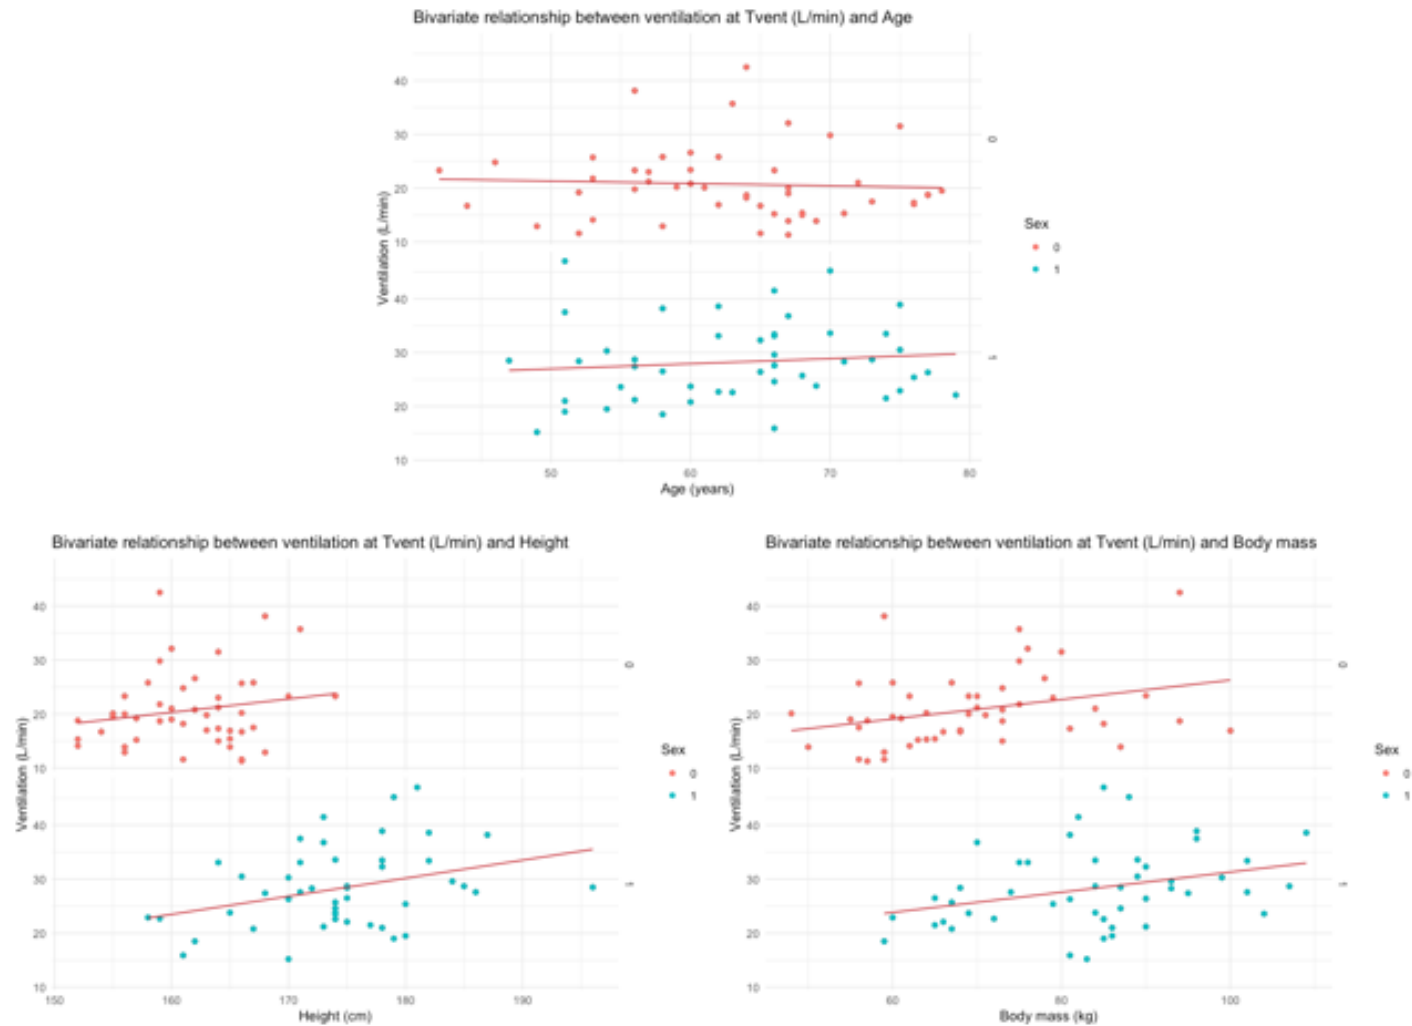



# CHEST™ Online Supplement

- e) Bivariate relationships between explanatory variables and tidal volume ( $V_T$ ) during symptom-limited incremental cardiopulmonary cycle exercise testing at the ventilatory threshold ( $T_{vent}$ ) in Canadian females (closed blue circles;  $n=49$ ) and males (closed red circles;  $n=47$ ) aged 40-80 years.

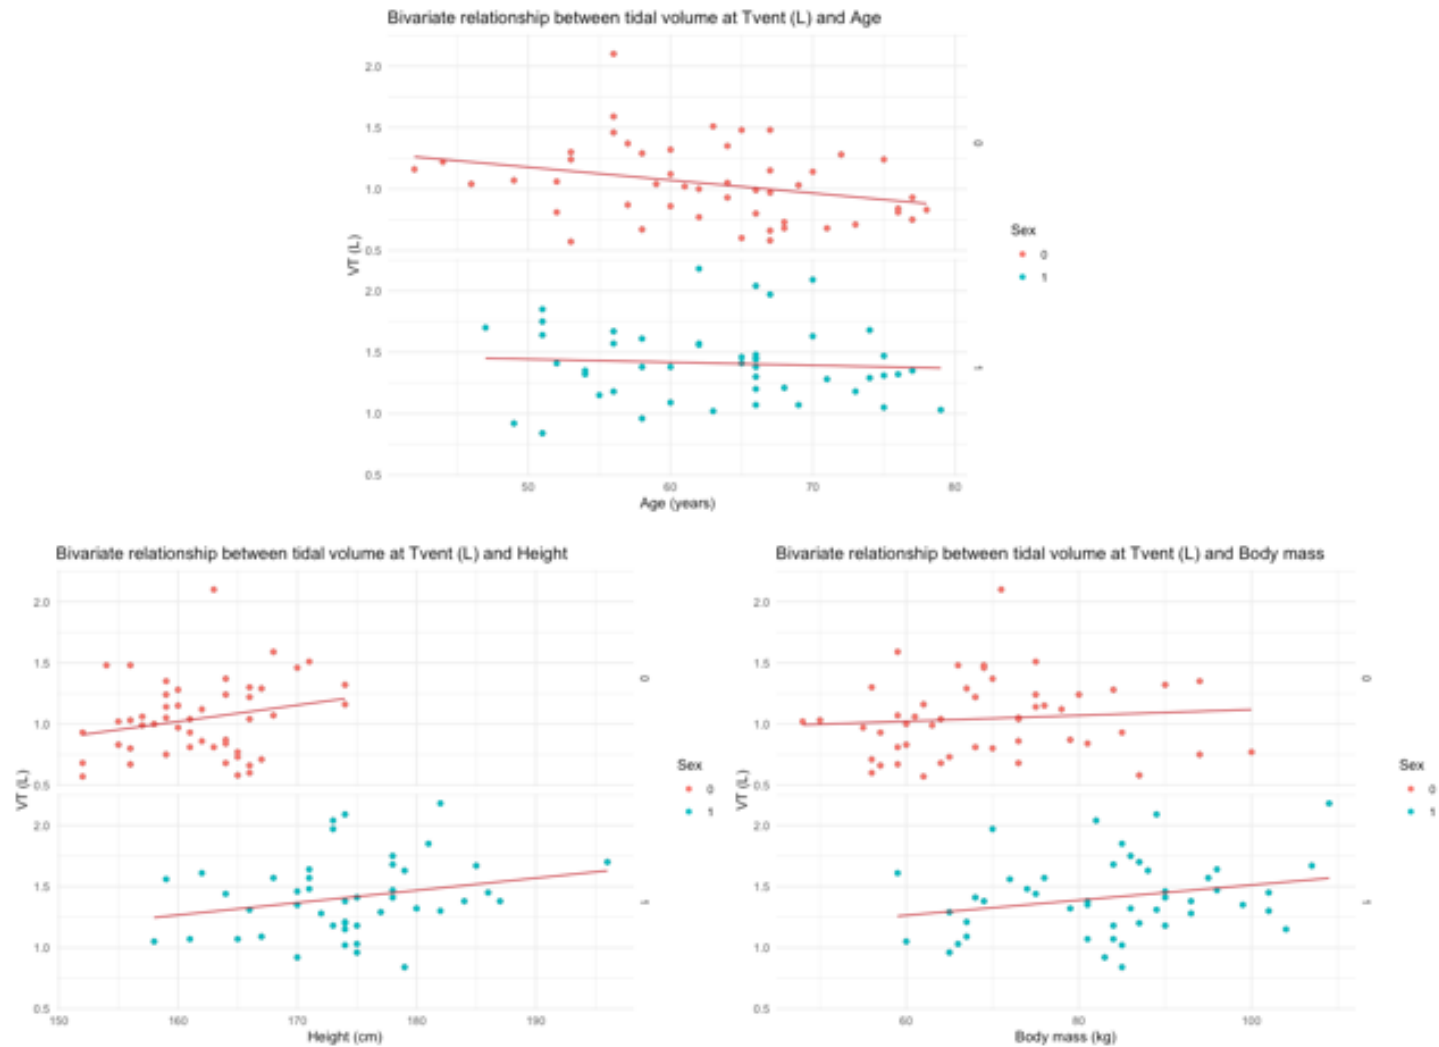

- f) Bivariate relationships between explanatory variables and inspiratory capacity (IC) during symptom-limited incremental cardiopulmonary cycle exercise testing at the ventilatory threshold (Tvent) in Canadian females (closed blue circles; n=49) and males (closed red circles; n=47) aged 40-80 years.

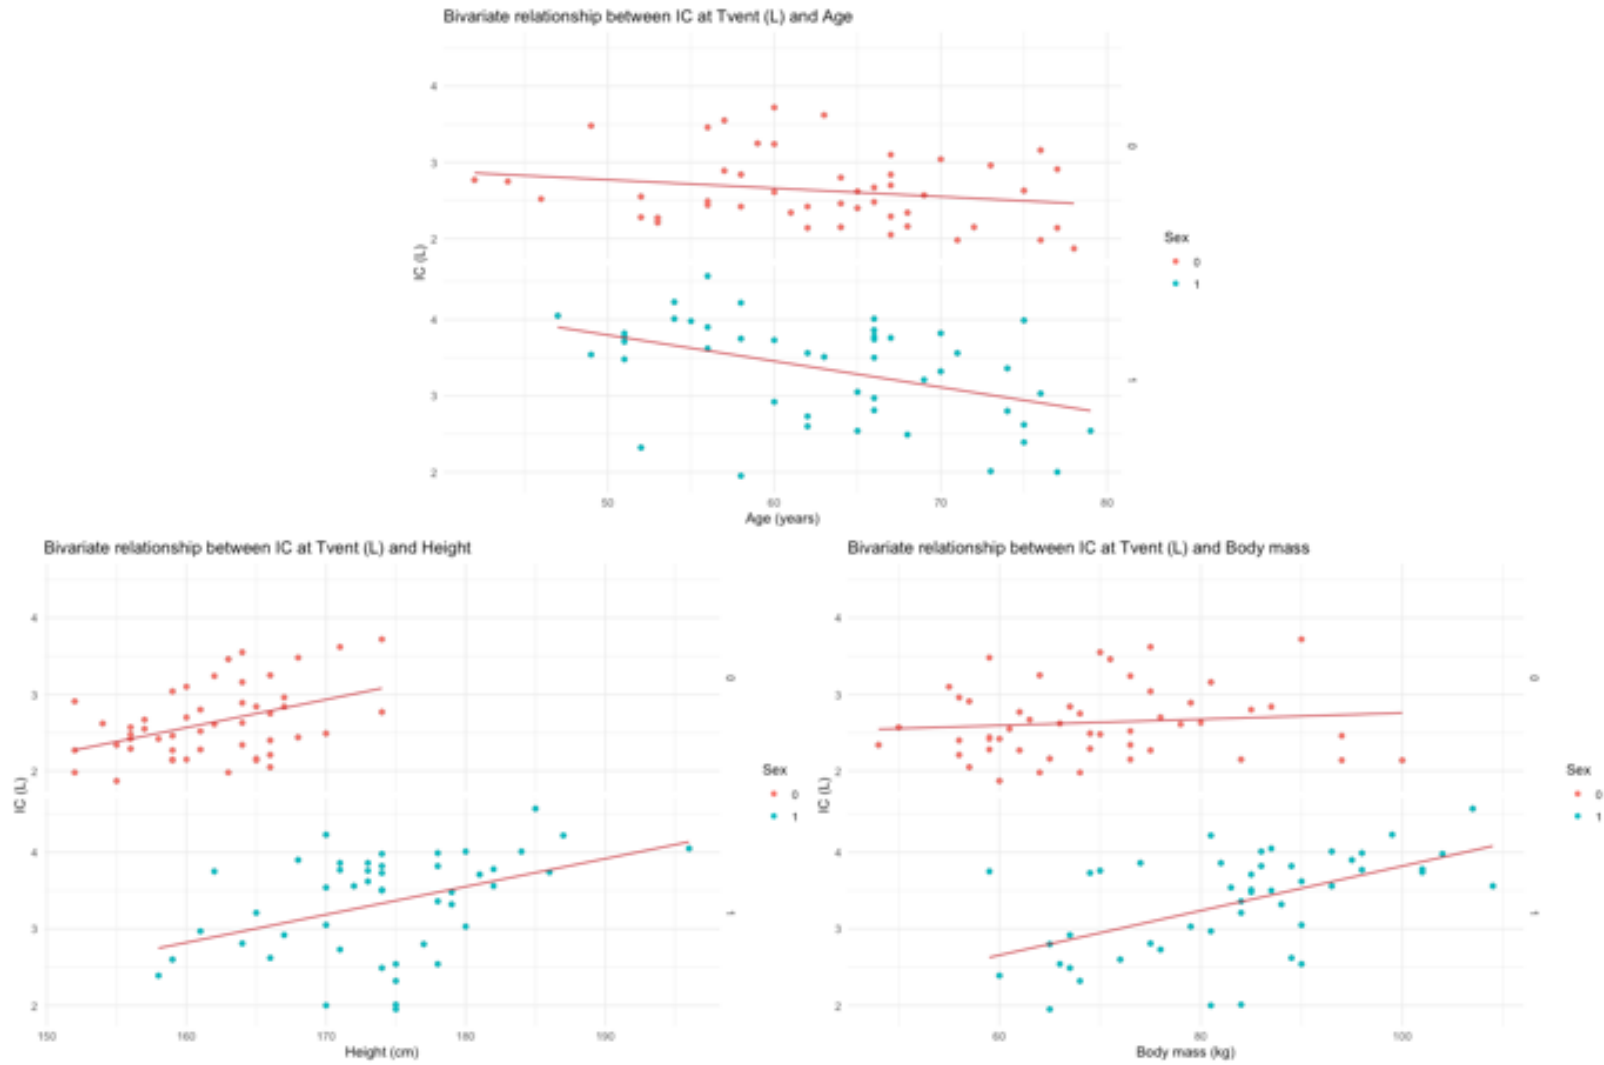

- g) Bivariate relationships between explanatory variables and end-inspiratory lung volume (EILV) during symptom-limited incremental cardiopulmonary cycle exercise testing at the ventilatory threshold (Tvent) in Canadian females (closed blue circles; n=49) and males (closed red circles; n=47) aged 40-80 years.

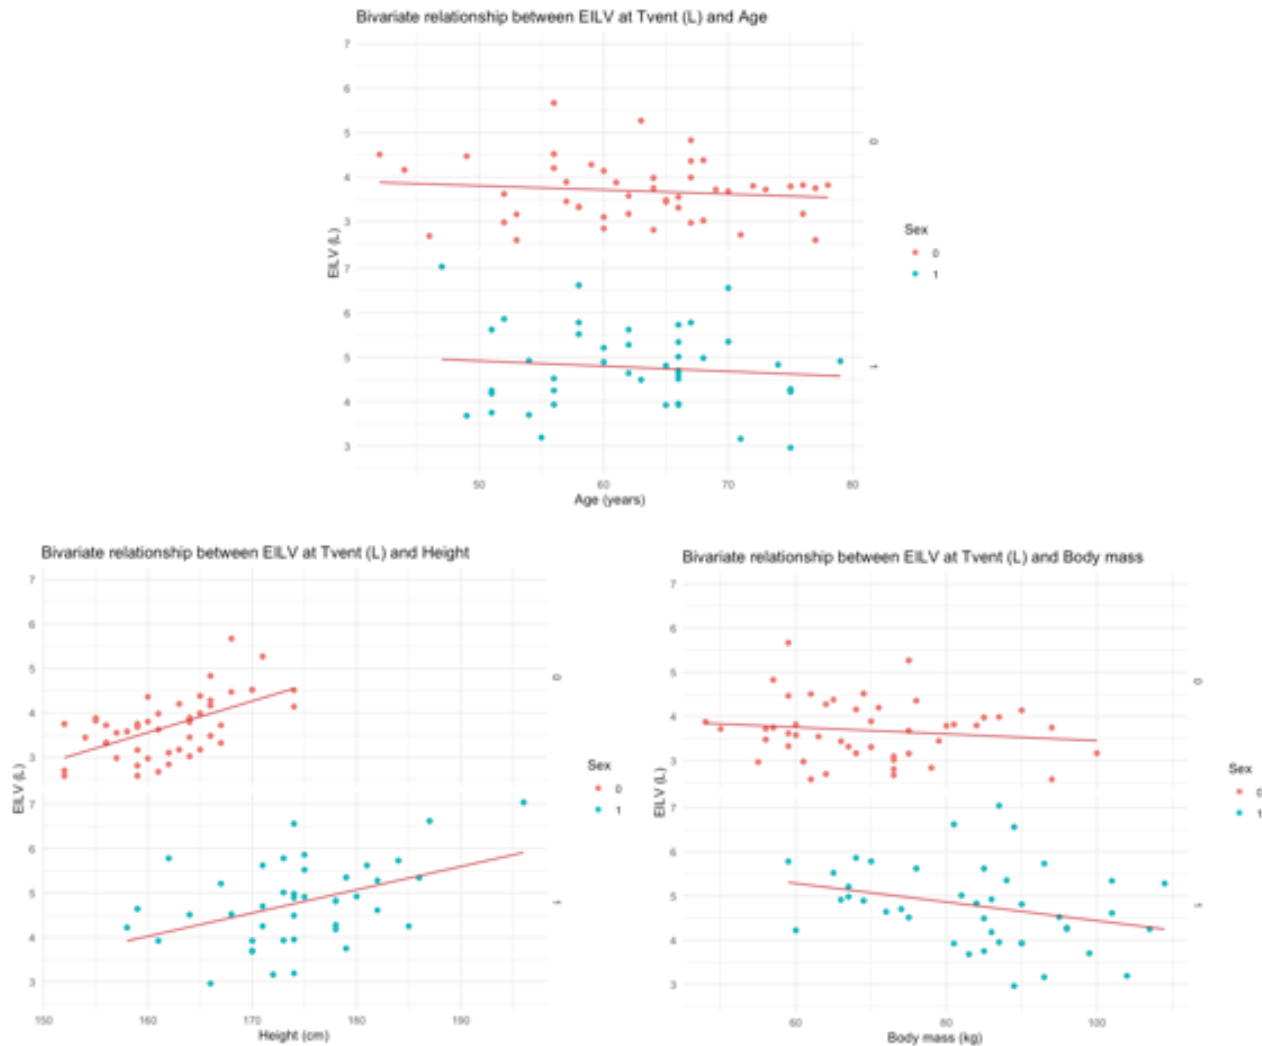

- h)** Bivariate relationships between explanatory variables and end-expiratory lung volume (EELV) during symptom-limited incremental cardiopulmonary cycle exercise testing at the ventilatory threshold (Tvent) in Canadian females (closed blue circles; n=49) and males (closed red circles; n=47) aged 40-80 years.

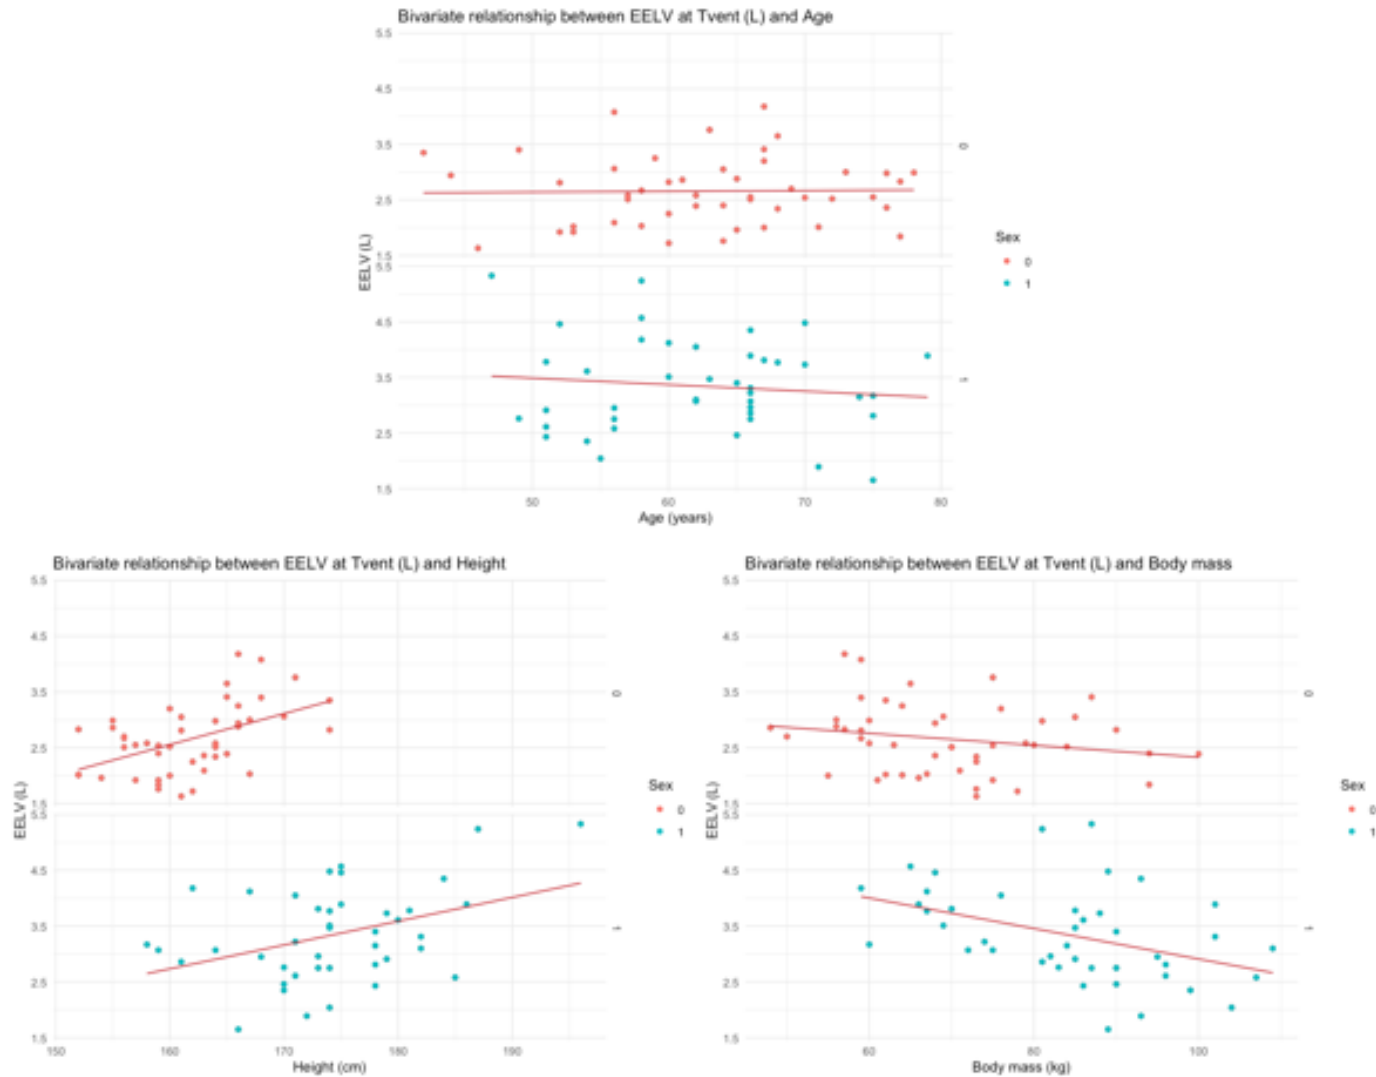

- i) Bivariate relationships between explanatory variables and end-expiratory lung volume (EELV) expressed as a percentage of total lung capacity (TLC) during symptom-limited incremental cardiopulmonary cycle exercise testing at the ventilatory threshold (Tvent) in Canadian females (closed blue circles; n=49) and males (closed red circles; n=47) aged 40-80 years.

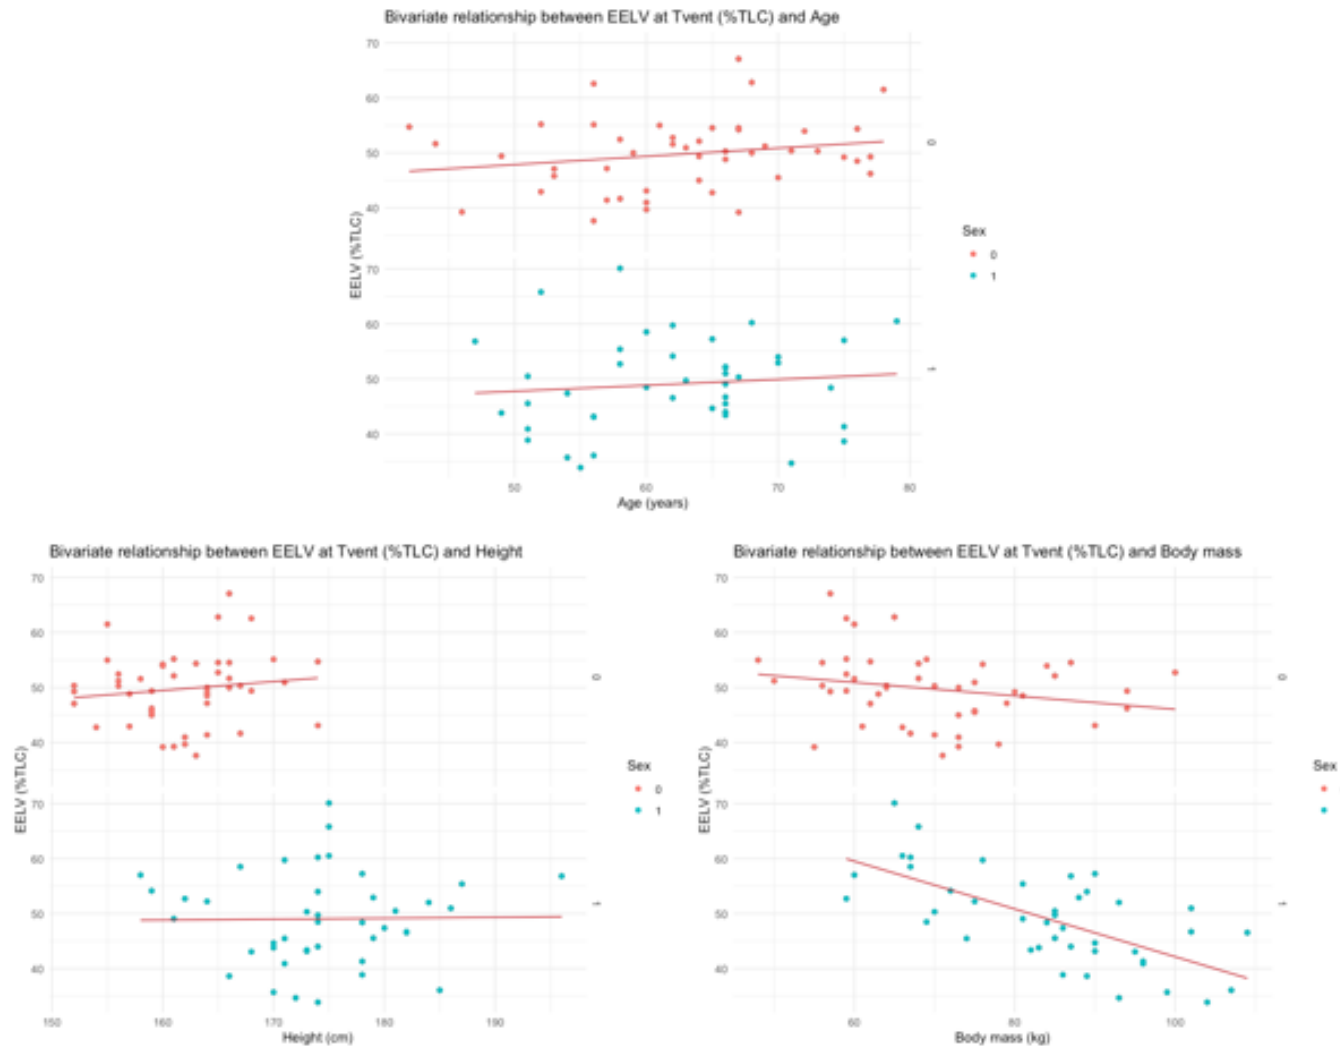

**j)** Correlation matrices for explanatory variables and CPET responses at the ventilatory threshold during symptom-limited incremental cardiopulmonary cycle exercise testing at the ventilatory threshold (Tvent) in Canadian females (a) and males (b) aged 40-80 years

**a) Females (n=49)**

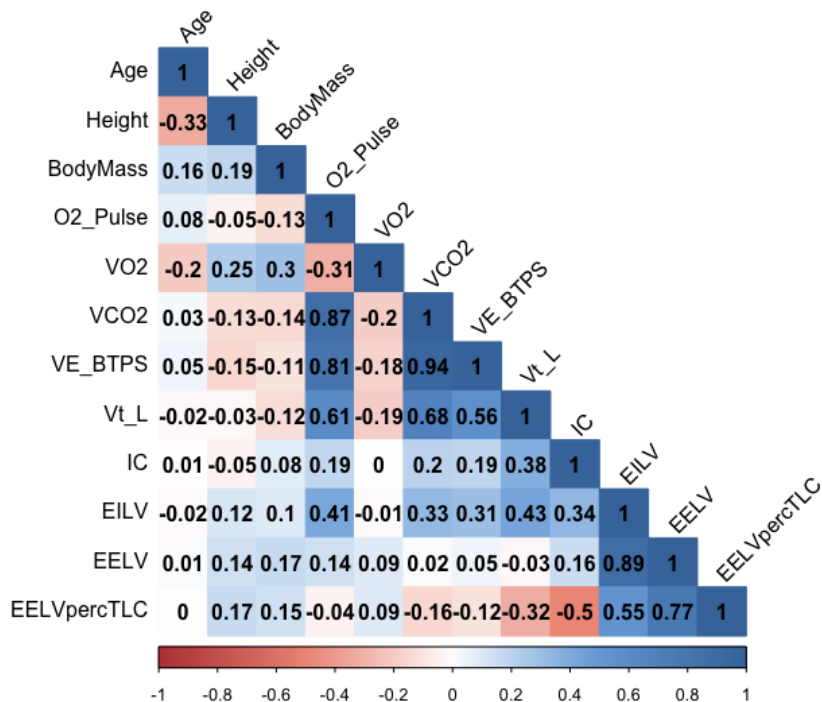

**b) Males (n=47)**

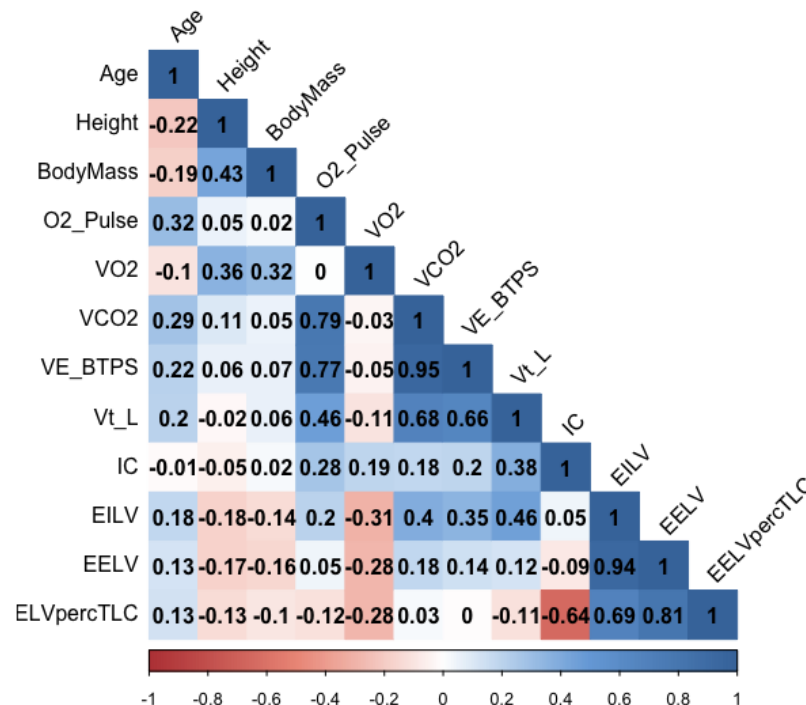

EELV, end-expiratory lung volume; EELVpercTLC, EELV as percentage of total lung capacity; EILV, end-inspiratory lung volume; IC, inspiratory capacity; O2\_Pulse, oxygen pulse; VCO2, rate of carbon dioxide production; VE, minute ventilation; VO2, rate of oxygen consumption; Vt\_L, tidal volume.

**e-Figure 2:** Age distribution of males (n=47) and females (n=49) from the Canadian Cohort Obstructive Lung Disease study that were included in the current study

**a) Females**

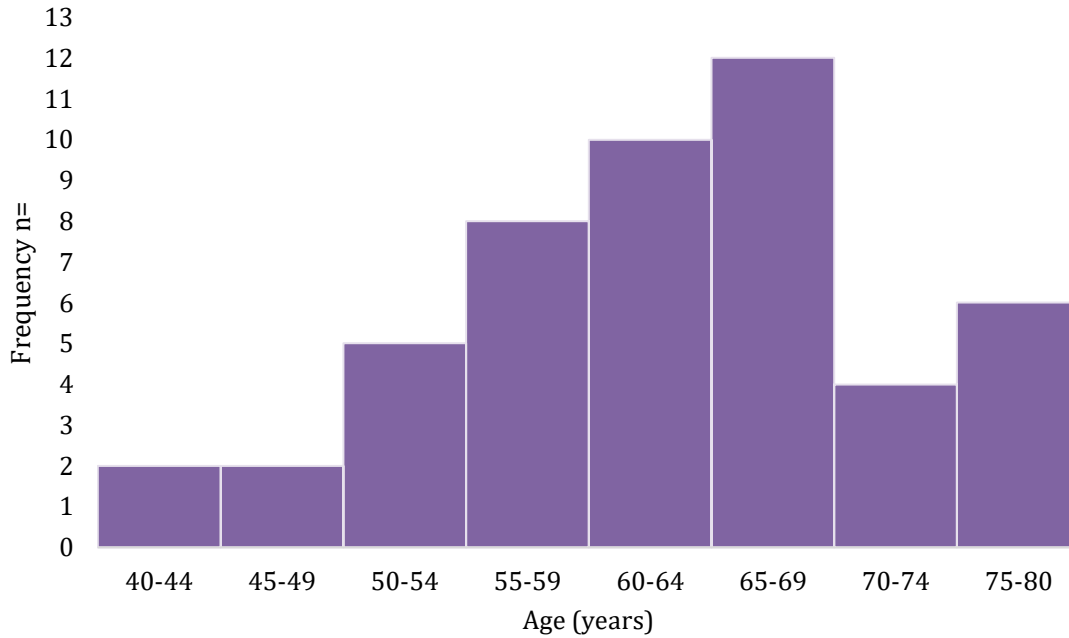

**b) Males**

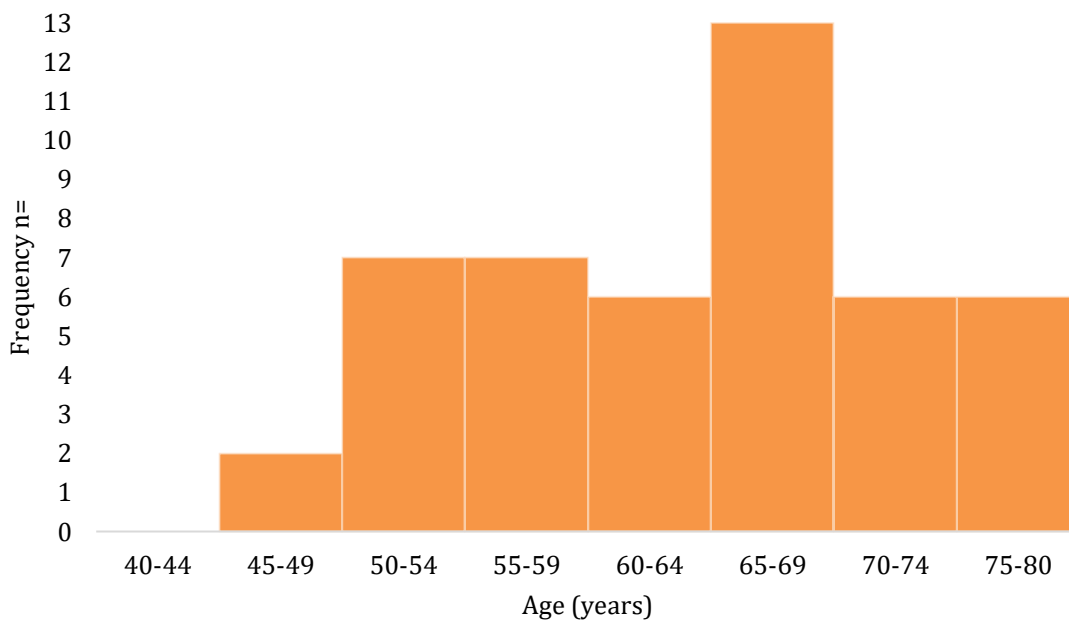

**e-Figure 3:** Comparison between the measured rate of O<sub>2</sub> consumption (V'O<sub>2</sub>) at the ventilatory threshold during incremental cycle cardiopulmonary cycle exercise testing, and the V'O<sub>2</sub> predicted using the newly developed prediction models (Lewthwaite et al.) and prediction models from Jones et al. (1985) (see reference<sup>10</sup> of main manuscript) and the Study of Health in Pomerania (SHIP) cohort (Koch et al. 2009, see reference<sup>38</sup> of main manuscript).

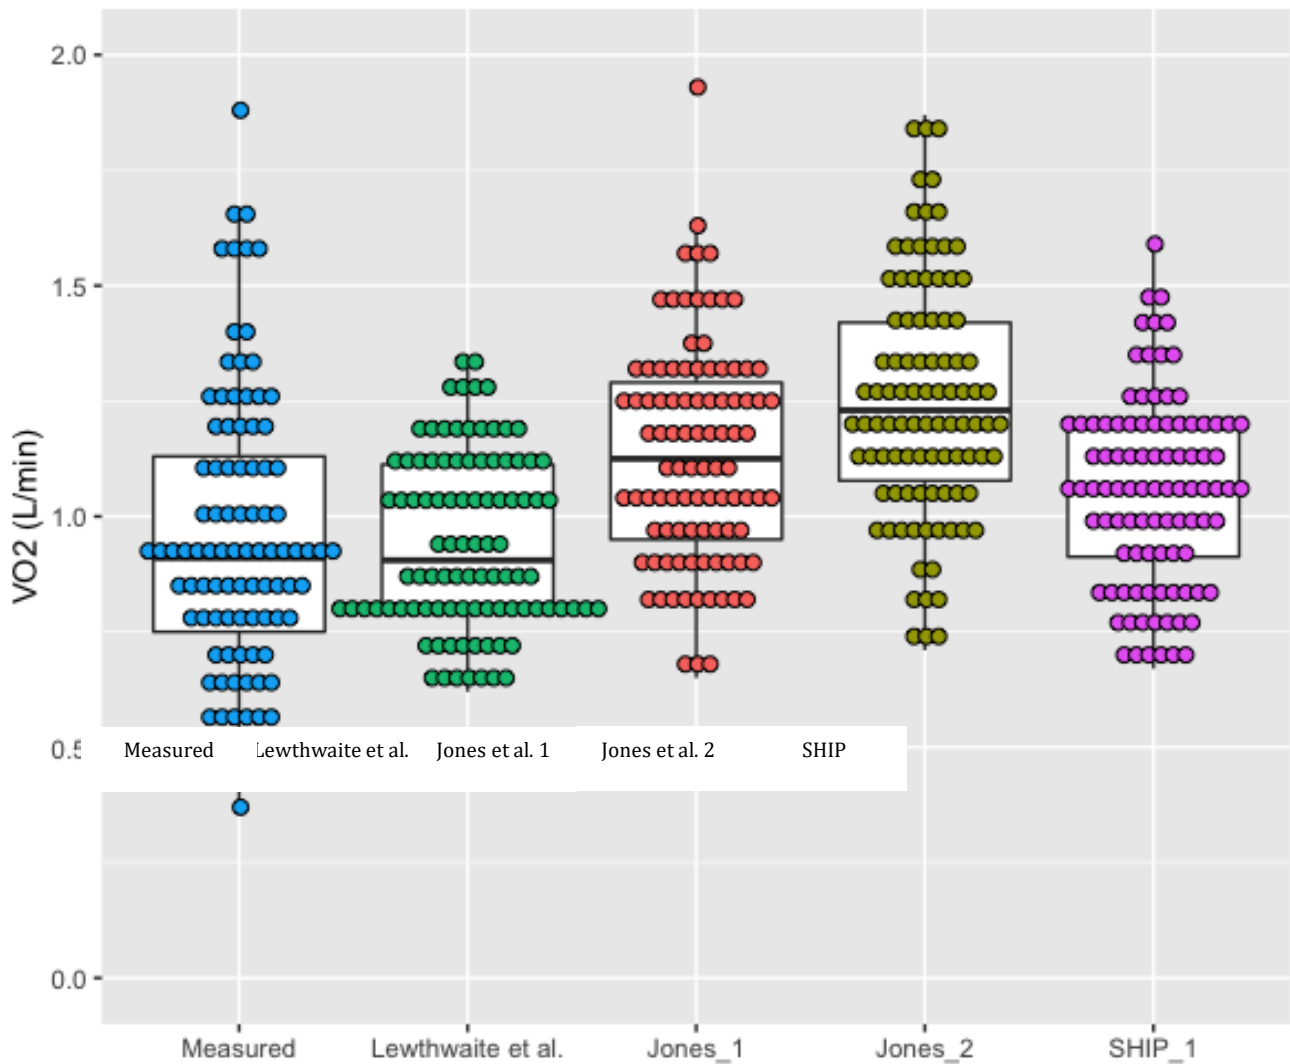

**Key:** Jones et al. 1 reference equations are based on participant height and age, while Jones et al. 2 reference equations additionally include participant body mass.
